# Supplementary material for: α-Synuclein Preformed Fibrils Bind to β-Neurexins and Impair β-Neurexin-Mediated Presynaptic Organization
Source: MDPI journal article supplement (doi:10.3390/cells12071083), 2023-04-04
Supplement: s1 [file s1]

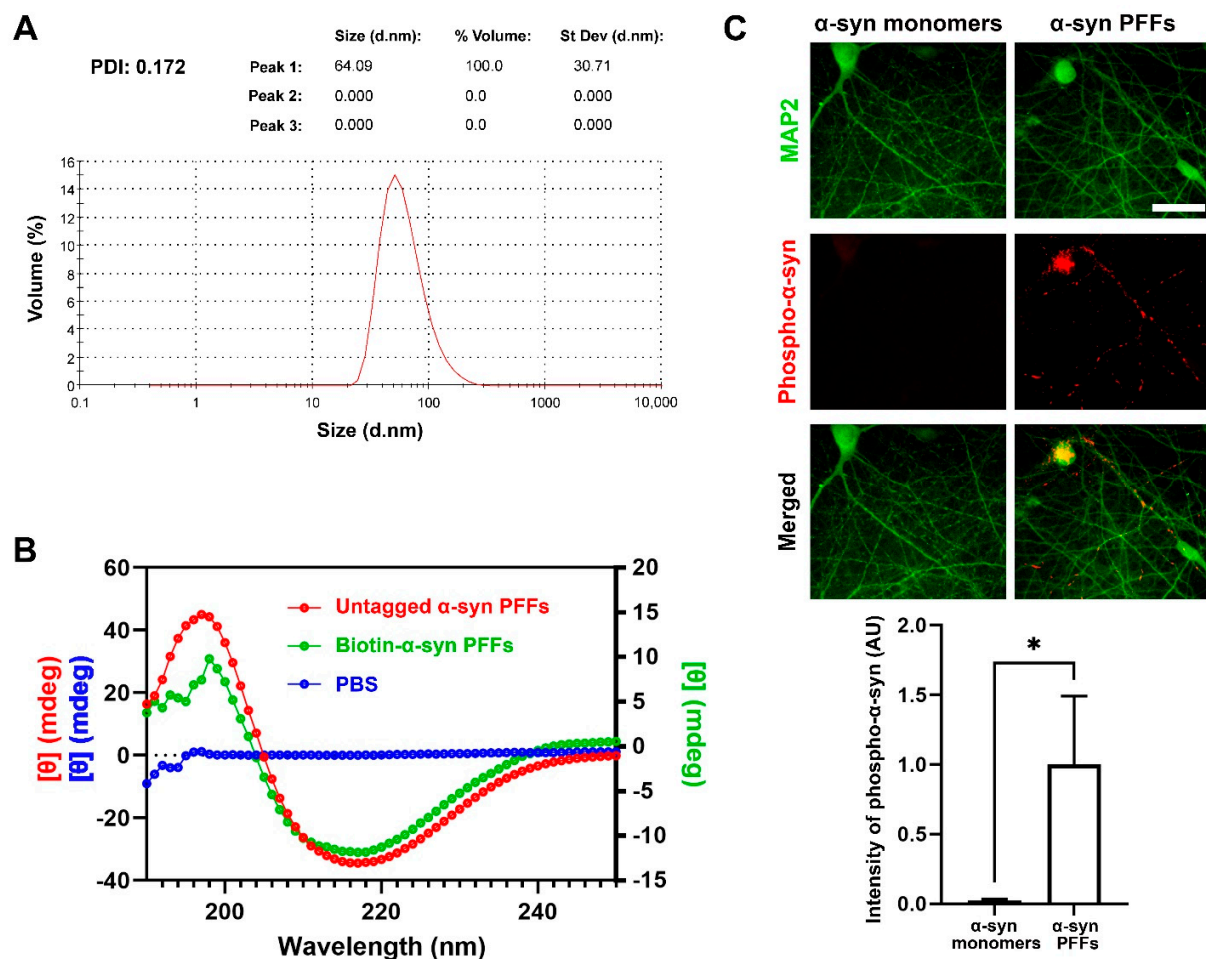

**Supplementary Figure S1. The biotinylation of  $\alpha$ -syn PFFs has no significant effect on their overall size, secondary structure or capability to induce hyperphosphorylation of endogenous  $\alpha$ -synuclein in neurons.** (A) Dynamic light scattering analysis of biotin- $\alpha$ -syn PFFs confirming that their average size is similar to that of untagged  $\alpha$ -syn PFFs (64.09 nm vs 52.85 nm) and that there is a single peak with polydispersity index (PDI) of 0.172, suggesting that they are relatively homogeneous aggregates like untagged  $\alpha$ -syn PFFs. (B) Circular dichroism (CD) spectra of PBS (blue), untagged  $\alpha$ -syn PFFs (0.25 mg/mL; red) or biotin- $\alpha$ -syn PFFs (0.15 mg/mL; green). A positive peak at around 195 – 200 nm followed by a negative peak at around 210 – 220 nm is a typical spectrum pattern of  $\beta$ -sheet structures [88]. The CD spectrum pattern of biotin- $\alpha$ -syn PFFs (green) is very similar to that of untagged  $\alpha$ -syn PFFs (red), suggesting that biotinylation does not affect the secondary structure of  $\alpha$ -syn PFFs. (C) Biotin- $\alpha$ -syn PFFs can induce hyperphosphorylation of endogenous  $\alpha$ -synuclein in hippocampal neuron cultures. Hippocampal cultured neurons were treated with biotin- $\alpha$ -syn PFFs (2.5  $\mu$ g/ml [174 nM monomer equivalent]) or biotin- $\alpha$ -syn monomers (2.5  $\mu$ g/ml) at 7 days *in vitro* (DIV). The cultures were maintained until 14 DIV and then immunostained for phospho- $\alpha$ -synuclein (red) and MAP2 (green) as a dendrite marker. Similar to untagged  $\alpha$ -syn PFFs (Figure 1D), treatment with biotin- $\alpha$ -syn PFFs, but not biotin- $\alpha$ -syn monomers, induced clusters of phosphorylated  $\alpha$ -synuclein immunoreactivity along neurites (**middle right panel**, red). Bar graph (**bottom**) showing the intensity quantification of phospho- $\alpha$ -synuclein immunoreactivity in neurons treated with biotin- $\alpha$ -syn monomers or biotin- $\alpha$ -syn PFFs. Mann-Whitney U test, \* $P < 0.05$ . Data are presented as mean  $\pm$  SEM. (n = 3 and 5 images for biotin- $\alpha$ -syn monomers or biotin- $\alpha$ -syn PFFs, respectively, from one experiment). Scale bar: 30  $\mu$ m.

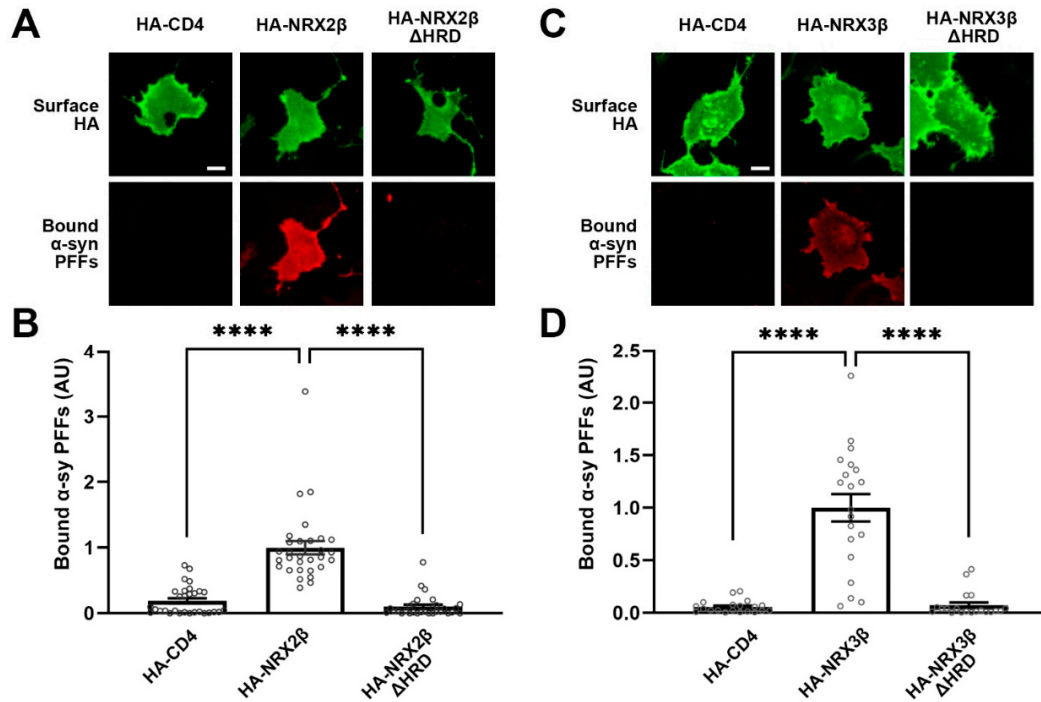

**Supplementary Figure S2. The N-terminal histidine-rich domain of neurexin 2β and 3β is responsible for the binding of α-syn PFFs.** (A, C) Representative images showing the binding of 1 μM biotin-α-syn PFFs to COS-7 cells expressing the indicated HA-NRX2β (A) and HA-NRX3β (C) constructs, either full-length or lacking the histidine-rich domain (HRD) (ΔHRD), or HA-CD4, a negative control. COS-7 cells expressing HA-NRX2β ΔHRD or HA-NRX3β ΔHRD show no binding of biotin-α-syn PFFs, appearing comparable to those expressing HA-CD4. All constructs have significant surface HA expression. (B, D) Quantification of the average intensity of bound biotin-α-syn PFFs on COS-7 cells expressing the indicated HA-NRX2β/3β constructs or HA-CD4. Kruskal-Wallis one-way ANOVA,  $P < 0.0001$ . \*\*\*\* $P < 0.0001$  in the indicated comparisons by Dunn's multiple comparisons test. N.S., not significant. Data are presented as mean  $\pm$  SEM. (n = 30 and 20 cells for **B** and **D** from three and two independent experiments, respectively).

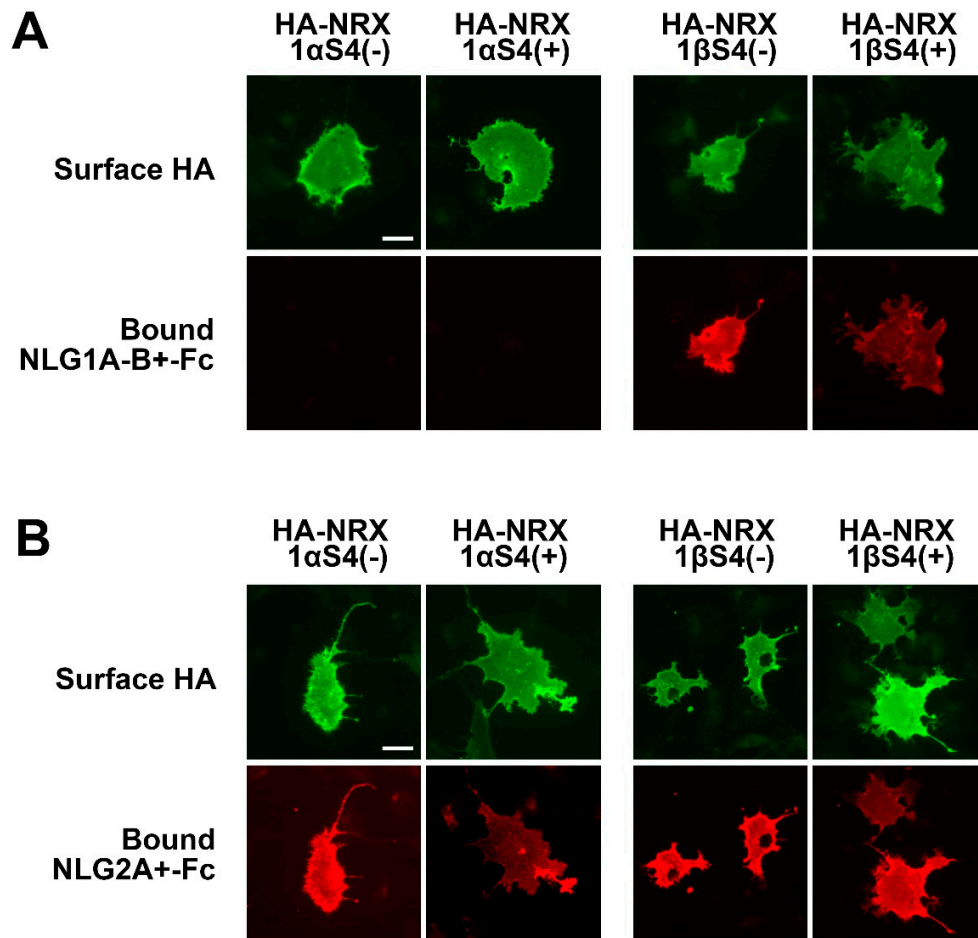

**Supplementary Figure S3. NLG1A-B+ binds to NRX1 $\beta$  but not NRX1 $\alpha$  whereas NLG2A+ binds to both NRX1 $\alpha$  and NRX1 $\beta$ .** (A, B) Representative images showing the binding of NLG1A-B+-Fc (A) and NLG2A+-Fc (B) to COS-7 cells expressing the indicated HA-NRXs constructs. As reported previously [22,62], NLG1A-B+-Fc binds to only NRX1 $\beta$ , and not NRX1 $\alpha$ . In contrast, NLG2A+-Fc binds to both NRX1 $\alpha$  and 1 $\beta$ . Scale bars: 30  $\mu$ m.

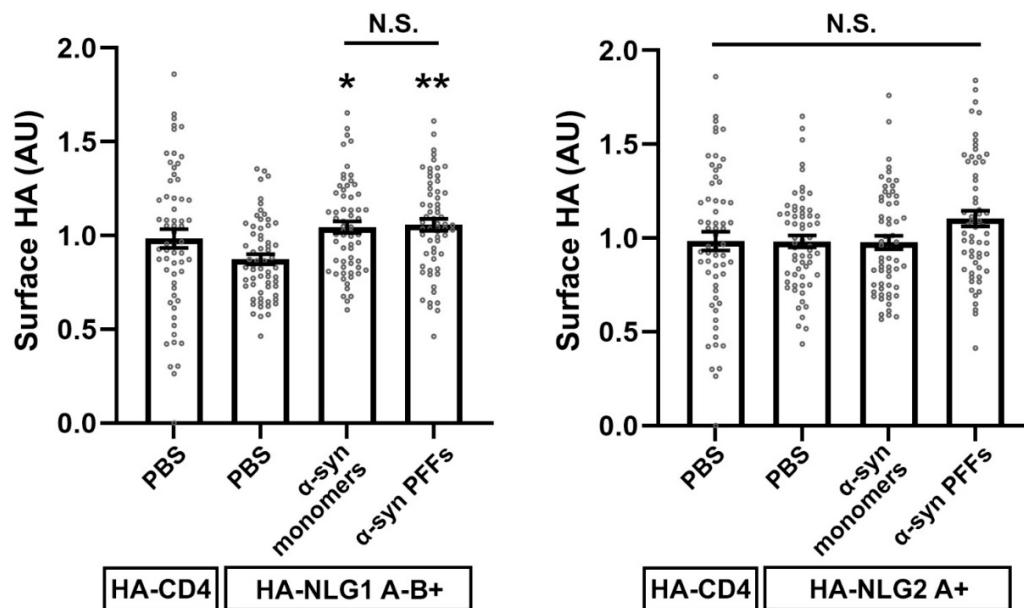

**Supplementary Figure S4.  $\alpha$ -syn PFF treatment does not decrease surface expression of HA-NLG1A-B+ or HA-NLG2A+ on HEK293T cells in the co-culture-based artificial synapse formation assays presented in Figure 7.** Quantification of surface HA expression level of HA-NLG1A-B+ (left) and HA-NLG2A+ (right) under the indicated treatment conditions in the co-culture-based artificial synapse formation assays presented in Figure 7. The level of surface HA expression after  $\alpha$ -syn PFF treatment in the NLG1A-B+ group (left) does not correlate with the NLG1A-B+-induced VGLUT1 and VGAT accumulation phenotype after  $\alpha$ -syn PFF treatment (Fig. 7B and C), excluding the possibility that the phenotype is due to decreased surface expression of HA-NLG1A-B+ on HEK293T cells after  $\alpha$ -syn PFF treatment. Kruskal-Wallis one-way ANOVA,  $P < 0.001$  for HA-NLG1 and  $P = 0.1439$  for HA-NLG2A+. \* $P < 0.01$  and \*\* $P < 0.001$  for the indicated comparisons by Dunn's multiple comparisons test. N.S., not significant. Data are presented as mean  $\pm$  SEM. ( $n > 60$  cells for each from four independent experiments).

## References in Supplementary figure legends

22. Craig, A.M.; Kang, Y. Neurexin-neuroligin signaling in synapse development. *Curr Opin Neurobiol* **2007**, *17*, 43-52, doi:S0959-4388(07)00013-X [pii]10.1016/j.conb.2007.01.011.
62. Boucard, A.A.; Chubykin, A.A.; Comoletti, D.; Taylor, P.; Sudhof, T.C. A splice code for trans-synaptic cell adhesion mediated by binding of neuroligin 1 to alpha- and beta-neurexins. *Neuron* **2005**, *48*, 229-236, doi:10.1016/j.neuron.2005.08.026.
88. Kelly, S.M.; Price, N.C. The use of circular dichroism in the investigation of protein structure and function. *Curr Protein Pept Sci* **2000**, *1*, 349-384, doi:10.2174/1389203003381315.
